# Supplementary material for: Precise control of the growth and size of Ni nanoparticles on Al2O3 by a MOF-derived strategy
Source: Royal Society of Chemistry journal article supplement (doi:10.1039/c9ce01127g), 2019-01-01
Supplement: c9ce01127g1.pdf [file c9ce01127g1.pdf]

**Precise control of the growth and size of Ni nanoparticle on Al<sub>2</sub>O<sub>3</sub> by  
a MOF-derived strategy**

Sha Li<sup>1,2</sup>, Qianqiang Wang<sup>1</sup>, Jingjun Lu<sup>1</sup>, Xiaonan Deng<sup>1</sup>, Shinan Bi<sup>1</sup>, Zhiwen Song<sup>1</sup>,  
Chao Guo<sup>1</sup>, Ruifeng Li<sup>1</sup>, Xiaoliang Yan<sup>1\*</sup>

<sup>1</sup> College of Chemistry and Chemical Engineering, Taiyuan University of Technology,  
Taiyuan 030024, P. R. China,

<sup>2</sup> College of Textile Engineering, Taiyuan University of Technology, Taiyuan 030024,  
P. R. China

Email: Xiaoliang Yan, [yanxiaoliang@tyut.edu.cn](mailto:yanxiaoliang@tyut.edu.cn)

\* Corresponding author

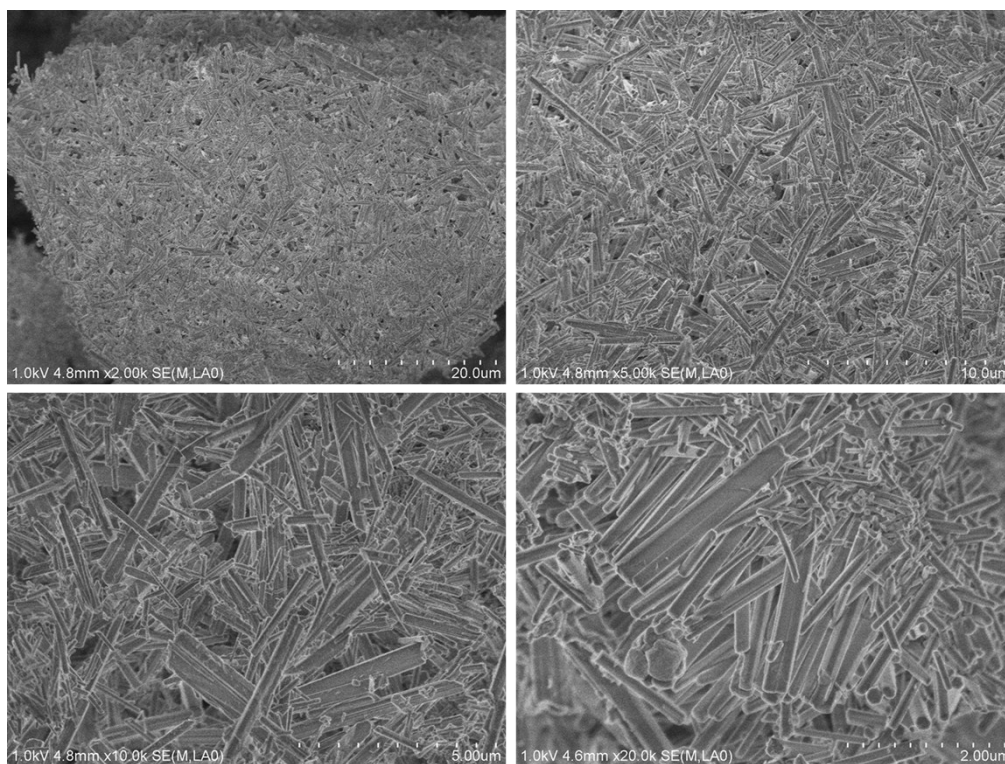

Figure S1. SEM images of MIL-110 (Al).

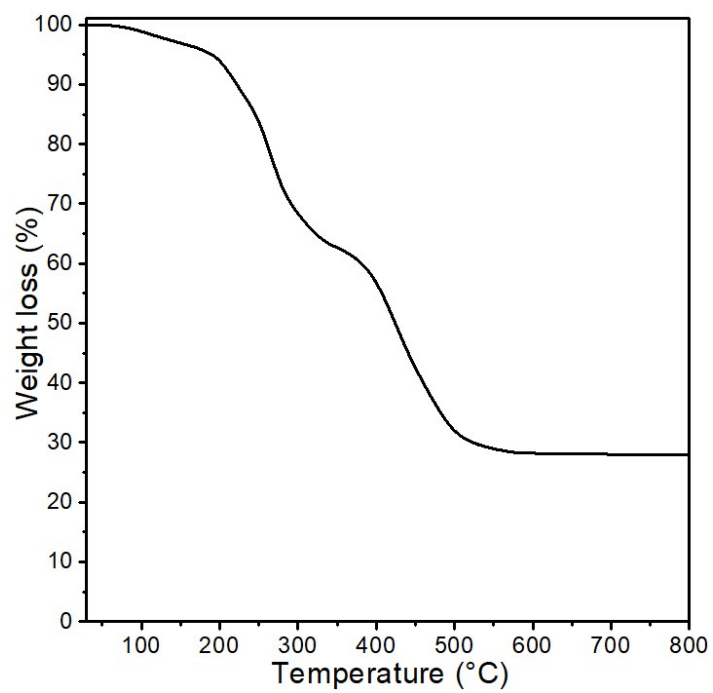

Figure S2. TG analysis of Ni<sup>2+</sup> impregnated MIL-110 (Al).

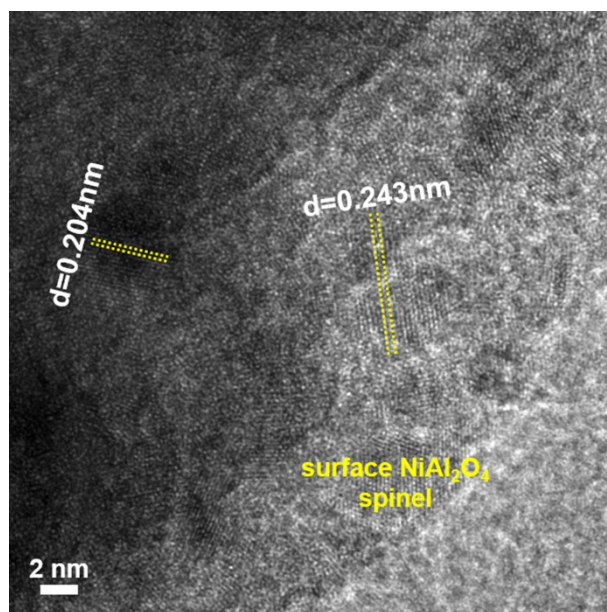

Figure S3. A high-resolution TEM image of surface  $\text{NiAl}_2\text{O}_4$  spinel structure on  $\text{Ni}/\text{Al}_2\text{O}_3\text{-600}$ .
